# Supplementary material
Source: PubMed Central journal article supplement (PMC1065380)

# Davenport et al. Supplementary Fig. 1

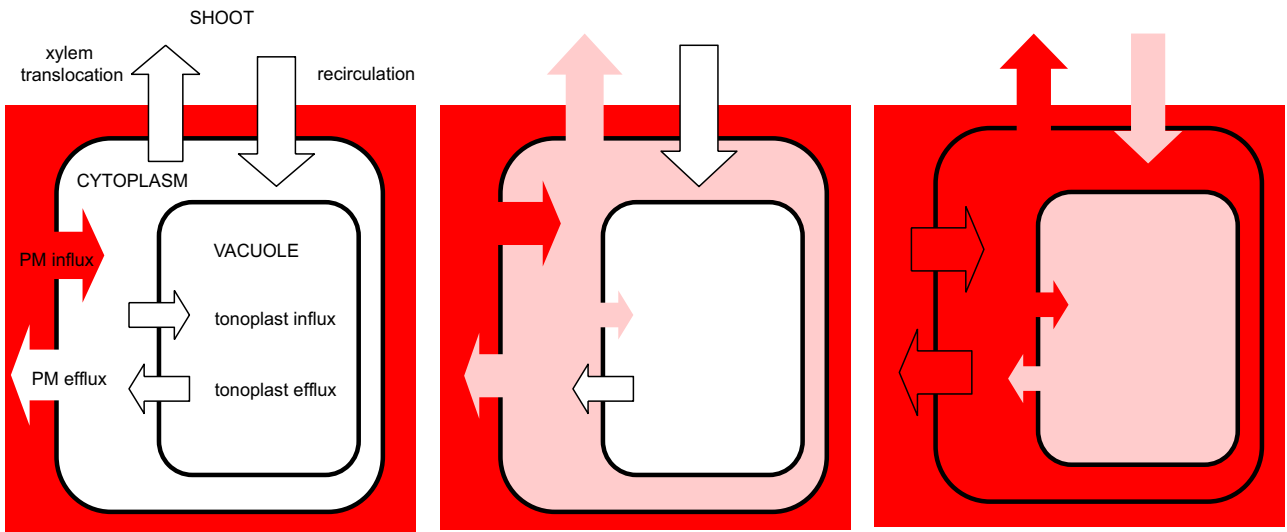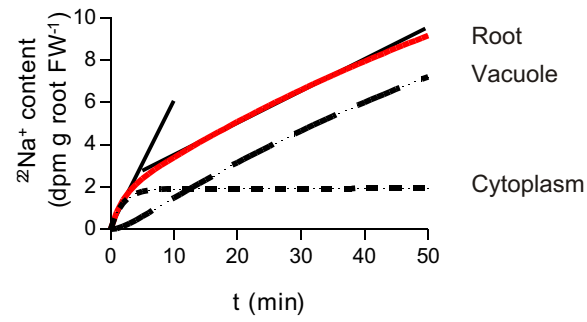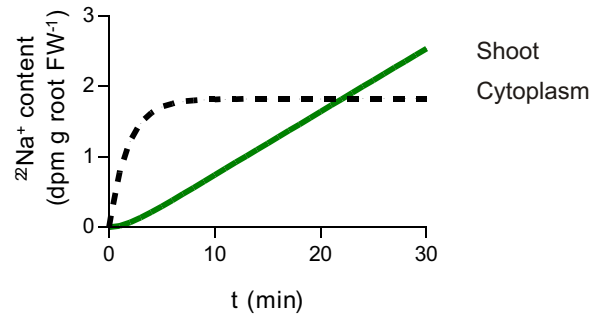

Supplement: plntphys_pp.104.057307_1.pdf [file plntphys_pp.104.057307_1.pdf]
